# Supplementary material for: A Transcriptional Activator of Ascorbic Acid Transport in Streptococcus pneumoniae Is Required for Optimal Growth in Endophthalmitis in a Strain-Dependent Manner
Source: MDPI journal article supplement (doi:10.3390/microorganisms7090290), 2019-08-24
Supplement: s1 [file s1]

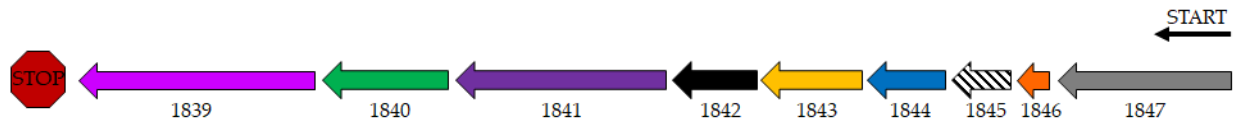

**Figure S1.** The *ula* operon in *S. pneumoniae* as determined by Afzal et al. [29]. Gene identifier numbers are for strain D39. *Spd\_1846* was identified as having reduced fitness in vitreous humor.

|               |                                          |                              |
|---------------|------------------------------------------|------------------------------|
| Query 481     | AGTGAGTTGCTGGAATCCTCCATAGGGATTTGGGA      | TTTGGATTATGTTTTATCCAGTTGG    |
| 540           |                                          |                              |
| Sbjct 2104171 | AGTGAGTTGCTGGAATCCTCCATAGGGATTTGGG       | TTTGGATTATGTTTTATCCAGTTGG    |
| 2104112       |                                          |                              |
| Query 601     | CAACTAGTACCTATTGTTAATCAATTAAAAGTTT       | GCCTTTTCGGTTTAGTATTCATTCTG   |
| 660           |                                          |                              |
| Sbjct 2104051 | CAGCTAGTACCTATTGTTAATCAATTAAAAGTTT       | ACCTTTTCGGTTTAGTATTCATTCTG   |
| 2103992       |                                          |                              |
| Query 781     | GTGTTTTCTGAGGATGATTATCGCTATATCACAG       | TTTTATTATCAAGTTGCTTTGAAGGT   |
| 840           |                                          |                              |
| Sbjct 2103871 | GTGTTTTCTGAGGATGATTATCGCTATATCAC         | CGTTTTATTATCAAGTTGCTTTGAAGGT |
| 2103812       |                                          |                              |
| Query 1261    | CCTCAAATTGAGTTTATAGGAACCTCAAAGATTGATGATT | TACAGGTGAAAGCTAGTAGT         |
| 1320          |                                          |                              |
| Sbjct 2103391 | CCTCAAATTGAGTTTATAGGAACCTCAAAGATTGATGATT | TACAGGTGAAAGTTAGTAGT         |
| 2103332       |                                          |                              |

**Figure S2.** Nucleotide differences between D39 and E335 in *ulaR2*. D39 is the Query line and E335 is the Subject.

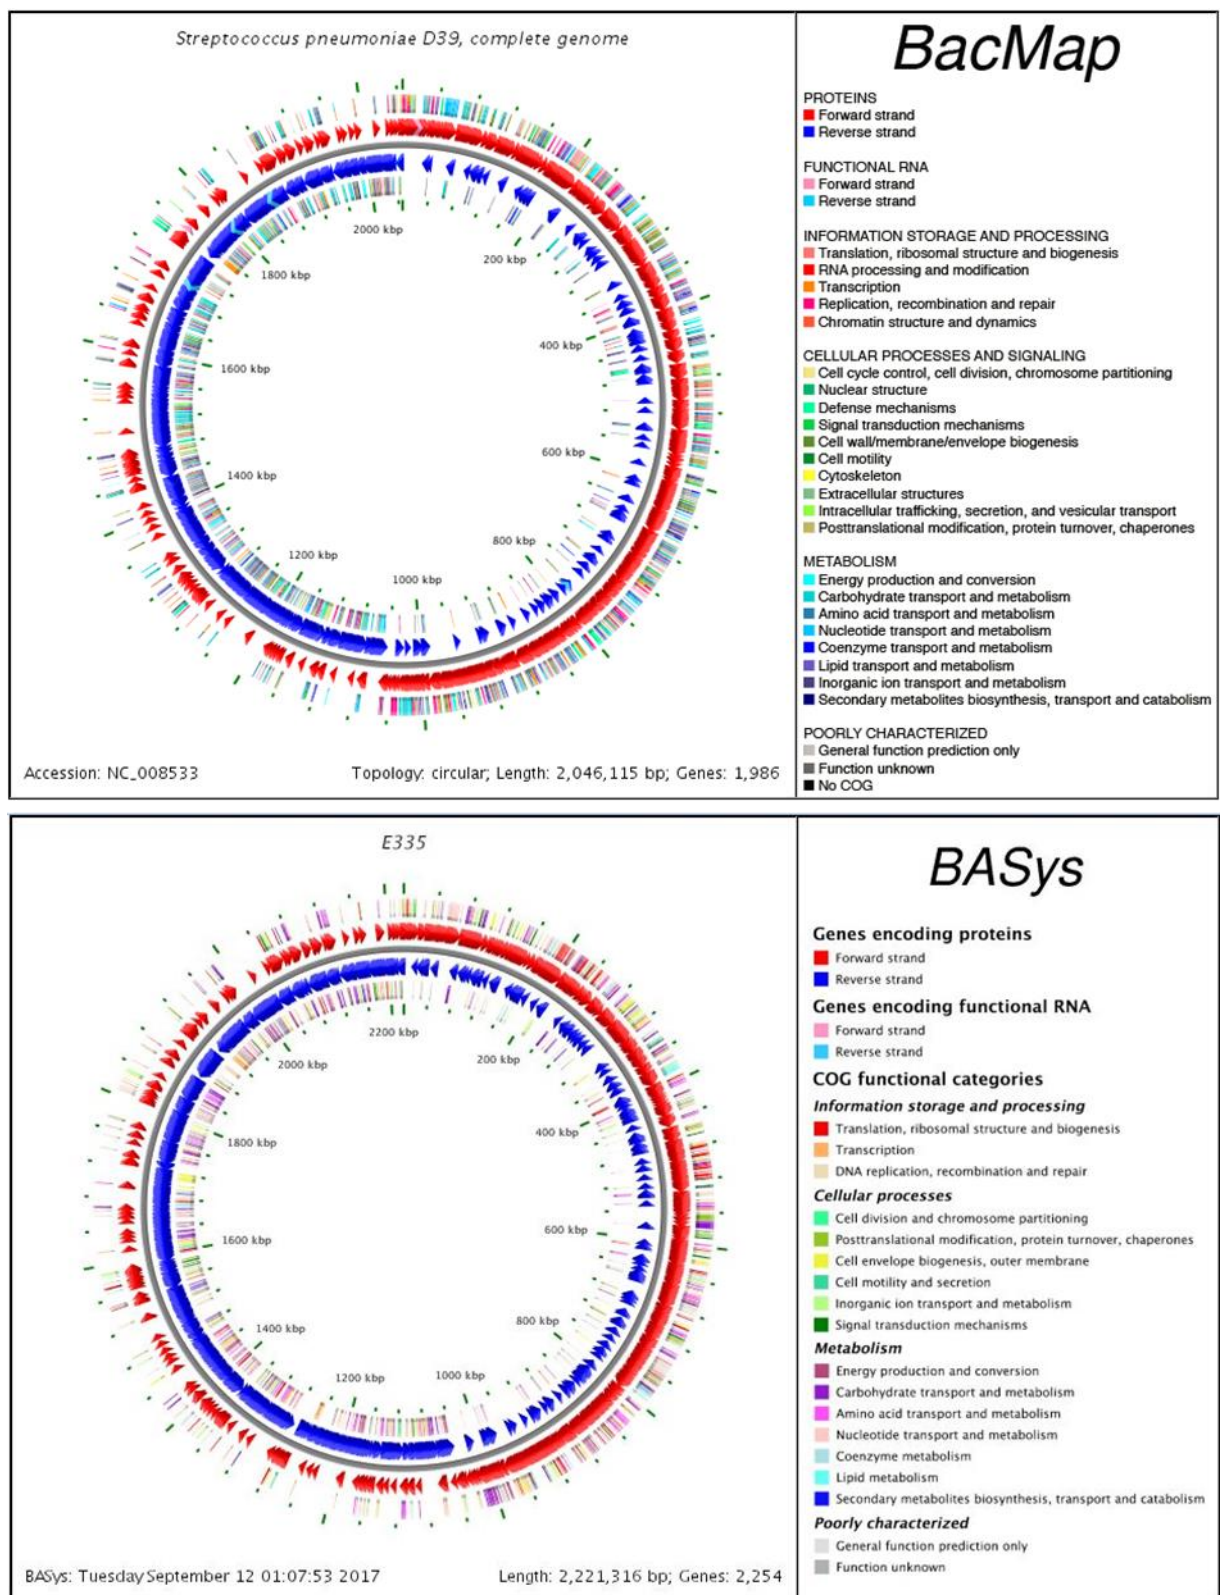

**Figure S3.** Genome maps of *S. pneumoniae* D39 generated by BacMap using GenBank accession #NC008533 (top panel) and E335 by BaSys using GenBank accession #CP026670 (bottom panel).
